# Supplementary material for: Structural analysis of fungal CENP-H/I/K homologs reveals a conserved assembly mechanism underlying proper chromosome alignment
Source: PubMed Central journal article supplement (PMC6326798; doi:10.1093/nar/gky1108), 2018-11-08
Supplement: gky1108_supplemental_files.pdf [file gky1108_supplemental_files.pdf]

## SUPPLEMENTARY INFORMATION

### **Structural Analysis of Fungi CENP-H/I/K Complex Reveals its Conserved Assembly Mechanism Underlying Faithful Chromosome Alignment**

Liqiao Hu<sup>1,†</sup>, Hao Huang<sup>1,†</sup>, Mohan Hei<sup>1</sup>, Yang Yang<sup>2</sup>, Sheng Li<sup>3</sup>, Yunshan Liu<sup>1</sup>, Zhen Dou<sup>4</sup>, Mengying Wu<sup>1</sup>, Jie Li<sup>5</sup>, Guang-zhong Wang<sup>5</sup>, Xuebiao Yao<sup>4</sup>, Hong Liu<sup>6</sup>, Xiaojing He<sup>1,\*</sup>, Wei Tian<sup>1,\*</sup>

<sup>1</sup>Key Laboratory of Molecular Biophysics of the Ministry of Education, College of Life Science and Technology, Huazhong University of Science and Technology, Wuhan 430074, China

<sup>2</sup>Department of Pharmacology, University of Texas Southwestern Medical Center, Dallas, TX 75390, USA

<sup>3</sup>Shanghai Institute for Advanced Immunochemical Studies, ShanghaiTech University, Shanghai 201210, China

<sup>4</sup>Anhui Key Laboratory for Cellular Dynamics & Chemical Biology, Hefei National Research Center for Physical Sciences at the Microscale, University of Science & Technology of China, Hefei 230027, China

<sup>5</sup>CAS Key Laboratory of Computational Biology, CAS-MPG Partner Institute for Computational Biology, Shanghai Institute of Nutrition and Health, Shanghai Institutes for Biological Sciences, University of Chinese Academy of Sciences, Chinese Academy of Sciences, Shanghai 200031, China

<sup>6</sup>Department of Biochemistry and Molecular Biology, Tulane University Health Science Center, New Orleans, LA 70112, USA

<sup>†</sup>These authors contributed equally to this work.

\*To whom correspondence may be addressed. Email: hexj@hust.edu.cn; or tianwei@hust.edu.cn

## SUPPLEMENTAL TABLE AND FIGURE LEGENDS

**Table S1. Data collection, phasing and refinement statistics for crystal structure of *ct*CENP-I<sup>NT</sup> alone and *ct*CENP-I<sup>NT</sup> complex with *th*CENP-H<sup>CT</sup>/K<sup>CT</sup>**

**Figure S1. The phylogenetic tree of CENP-I (A), CENP-H (B) and CENP-K (C) from divergent species, and the reconstitution of *th*CENP-H/I<sup>NT</sup>/K complex (D).**

**Figure S2. Sequence alignment of the CENP-I from multiple species**

The alignment is generated using the online ESPript 3.0 server. Secondary structural elements predicted from PSI-PRED online server and found from crystal structure are indicated above the sequences, with the color blue and gray. The sequence of *ct*CENP-I shares high similarity (50%) with human CENP-I (E-value 7.65E-20) and high identity (62%) with *th*CENP-I.

**Figure. S3 Sequence alignment of the CENP-K from multiple species**

The sequence similarity between *th*CENP-K and *hs*CENP-K is 40%, based on the reciprocal Best BLAST result (E-value= 1.81E-06).

**Figure. S4 Sequence alignment of the CENP-H from multiple species.**

The *th*CENP-H exhibits a relative low sequence similarity (29%) with *hs*CENP-H, but the residues involved in the binding interfaces for the complex formation show higher conservation levels.

**Figure S5. Density maps of *th*CENP-H<sup>CT</sup> and *th*CENP-K<sup>CT</sup>, and crystal structure of the ternary complex in one asymmetric unit**

**A.** Cartoon view of fungi CENP-H/I/K complex structure. Even though two molecules of *ct*CENP-I<sup>NT</sup> (cyan and green) were found in one asymmetric unit, only one binds to the heterodimer of *th*CENP-H<sup>CT</sup> (magenta) and *th*CENP-K<sup>CT</sup> (yellow).

**B.** SDS-PAGE electrophoresis analyses of the complex crystals, stained with Coomassie Blue.

**C.** Electron density for *th*CENP-H<sup>CT</sup> in the complex structure, composite omit map calculated with Phenix, contoured at 1.0 $\sigma$ .

**Figure S6. Analyses of the binding activities of *thCENP-H* WT or mutants bound to GST-*thCENP-K*<sup>ΔN75</sup> and GST-*thCENP-K*<sup>FL</sup>**

**A.** *In vitro* binding assays were performed to examine the binding activity between *thCENP-H*<sup>N164</sup> (ΔCT) and *thCENP-K*<sup>N143</sup> (ΔCT) complex and *ctCENP-I*<sup>NT</sup>.

**B** and **C.** Recombinant *thCENP-H* WT or mutant proteins were mixed with GST or GST-*thCENP-K*<sup>ΔN75</sup> (**B**) and GST-*thCENP-K*<sup>FL</sup> (**C**) proteins. GST pull-down assays were performed. The bead-bound proteins were resolved with SDS-PAGE and stained with Coomassie Blue. Quantification was summarized for both in **Figure 3B**.

**Figure S7. Analyses of the binding activities of *hsCENP-H* WT or mutants bound to GST-*hsCENP-K*<sup>ΔN85</sup> and GST-*hsCENP-K*<sup>FL</sup>**

**A** and **B.** Recombinant *hsCENP-H* WT or mutant proteins were mixed with GST or GST-*hsCENP-K*<sup>ΔN85</sup> (**A**) and GST-*hsCENP-K*<sup>FL</sup> (**B**) proteins. GST pull-down assays were performed. The bead-bound proteins were resolved with SDS-PAGE and stained with Coomassie Blue. Quantification was summarized for both (**A** and **B**) in **Figure 3D**.

**Figure S8. Analyses of the binding activities of *thCENP-H* WT or mutants bound to *ctCENP-I*<sup>NT</sup>, and Immuno-blotting analyses of gene knock-down and overexpression in cell experiment.**

**A.** Recombinant *thCENP-H* WT or mutant proteins were mixed with GST or GST-*ctCENP-I*<sup>NT</sup> proteins. GST pull-down assays were performed. The bead-bound proteins were resolved with SDS-PAGE and stained with Coomassie Blue. Quantification was available in **Figure 4B**.

**B.** Cell lysates of HeLa Tet-On cells treated with Luciferase, *hsCENP-H* or *hsCENP-I* siRNA were resolved with SDS-PAGE and blotted with the indicated antibodies.

**C.** Cell lysates of HeLa Tet-On cells in **Figure 5D** were resolved with SDS-PAGE and blotted with the indicated antibodies.

## Data collection, phasing and refinement statistics

|                                                     | <i>ct</i> CENP-INT(Se-Met)       | <i>ct</i> CENP-INT complex with <i>th</i> CENP-HCT/ KCT |
|-----------------------------------------------------|----------------------------------|---------------------------------------------------------|
| <b>Wavelength</b>                                   | 0.9778                           | 0.986                                                   |
| <b>Resolution range (Å)</b>                         | 46.197 - 2.298(2.38-2.30)*       | 46.46 - 2.199 (2.24-2.20)*                              |
| <b>Space group</b>                                  | P 41212                          | P 41                                                    |
| <b>Unit cell (<i>a</i>, <i>b</i>, <i>c</i> (Å))</b> | 59.671 59.671 145.971 90 90 90   | 67.847 67.847 186.269 90 90 90                          |
| <b>Unique reflections</b>                           | 22388(2244)                      | 42600 (4220)                                            |
| <b>Multiplicity</b>                                 | 4.5 (4.5)                        | 9.4 (7.6)                                               |
| <b>Completeness (%)</b>                             | 99.7 (99.9)                      | 100 (99.5)                                              |
| <b>Mean I/sigma(I)</b>                              | 21.42(3.25)                      | 29.64(1.44)                                             |
| <b>Wilson B-factor</b>                              | 47.39                            | 46.37                                                   |
| <b>R-meas<sup>†</sup></b>                           | 0.070(0.588)                     | 0.102 (1.562)                                           |
| <b>R-pim<sup>‡</sup></b>                            | 0.033 (0.274)                    | 0.033 (0.559)                                           |
| <b>CC<sub>1/2</sub><sup>§</sup></b>                 | 0.866                            | 0.694                                                   |
| <b>Phase determination</b>                          |                                  |                                                         |
| <b>Anomalous scatterer</b>                          | Selenium (1 of 1 possible sites) |                                                         |
| <b>Figure of merit, 46.20–2.30 Å</b>                | 0.246                            |                                                         |
| <b>Refinement statistics</b>                        |                                  |                                                         |
| <b>Reflections used in refinement</b>               | 12379(1202)                      | 42479 (2611)                                            |
| <b>Reflections used for R-free</b>                  | 1238 (134)                       | 2143 (228)                                              |
| <b>R-work</b>                                       | 0.1739 (0.2132)                  | 0.1877 (0.3134)                                         |
| <b>R-free</b>                                       | 0.2277 (0.2867)                  | 0.2298 (0.3549)                                         |
| <b>Number of non-hydrogen atoms</b>                 | 1790                             | 4699                                                    |
| <b>macromolecules</b>                               | 1700                             | 4579                                                    |
| <b>solvent</b>                                      | 90                               | 120                                                     |
| <b>Protein residues</b>                             | 213                              | 544                                                     |
| <b>RMS(bonds)</b>                                   | 0.007                            | 0.008                                                   |
| <b>RMS(angles)</b>                                  | 0.961                            | 0.901                                                   |
| <b>Ramachandran favored (%)<sup>#</sup></b>         | 98.09                            | 97.14                                                   |
| <b>Ramachandran allowed (%)<sup>#</sup></b>         | 1.91                             | 2.5                                                     |
| <b>Ramachandran outliers (%)<sup>#</sup></b>        | 0                                | 0.36                                                    |
| <b>Rotamer outliers (%)</b>                         | 3.24                             | 0.82                                                    |
| <b>Clashscore</b>                                   | 4.03                             | 8.82                                                    |
| <b>Average B-factor</b>                             | 54.73                            | 69.44                                                   |
| <b>macromolecules</b>                               | 54.44                            | 69.79                                                   |
| <b>solvent</b>                                      | 60.28                            | 56.11                                                   |

\*Data for the highest-resolution shell are shown in parentheses

<sup>†</sup>R-meas =  $\sum_h (n_h - 1)^{1/2} \sum_i |I_i(h) - \langle I(h) \rangle| / \sum_h \sum_i I_i(h)$ , where  $I_i(h)$  and  $\langle I(h) \rangle$  are the *i*th and mean measurement of the intensity of reflection *h*.

<sup>‡</sup>R-pim =  $100 \sum_h \sum_i [1/(n_h - 1)]^{1/2} |I_{h,i} - \langle I_h \rangle| / \sum_h \sum_i \langle I_{h,i} \rangle$ , where  $n_h$  is the number of observations of reflections *h*.

<sup>§</sup>CC<sub>1/2</sub> values shown are for the highest resolution shell.

<sup>#</sup>As defined by the validation suite MolProbity.

**Table S1**

**A** Maximum-Likelihood Phylogenetic Tree of CENP-I

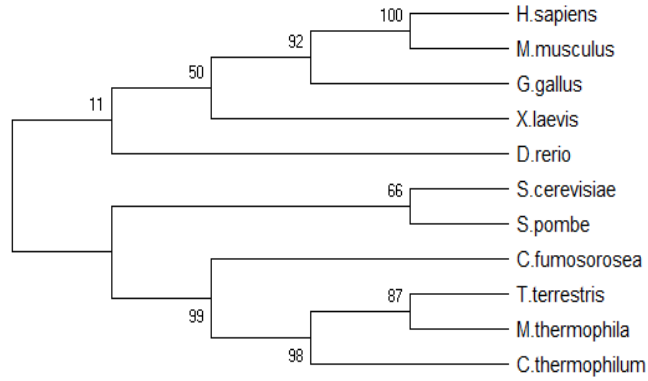

**B** Maximum-Likelihood Phylogenetic Tree of CENP-H

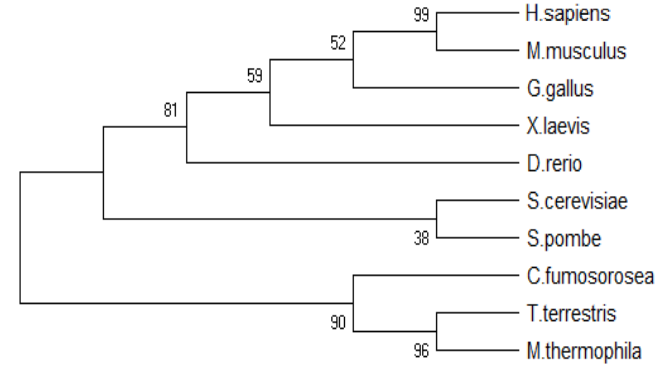

**C** Maximum-Likelihood Phylogenetic Tree of CENP-K

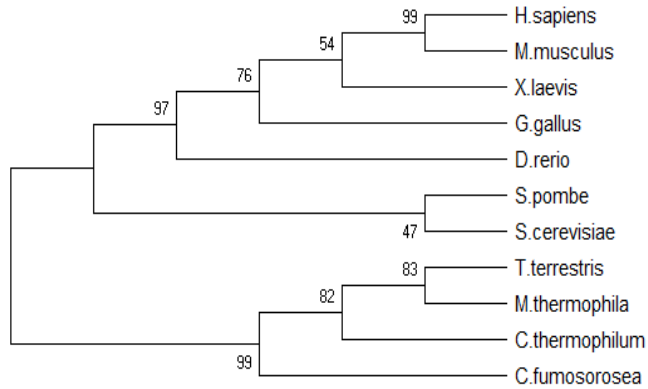

**D**

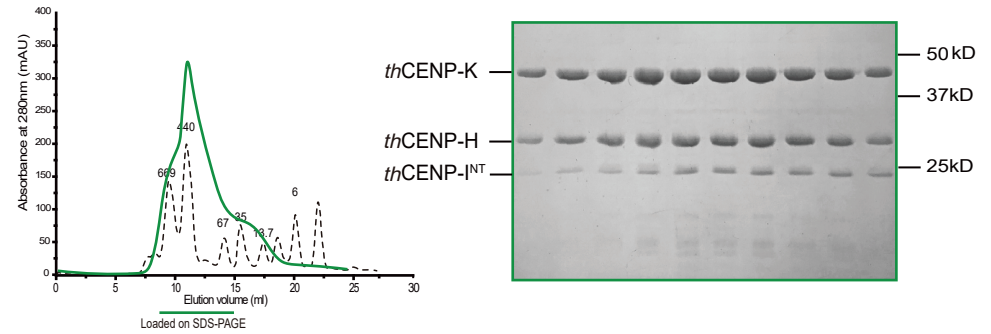

**Figure S1**

# CENP-I Alignment

PDB

PSIPRED

```
1      10      20      30      40      50      60
H. sapiens  MSPQKRVRVKNVQAQNRRTSQGSSSFQTTLTSAWKVKQDPNSKNISKHGQNNPVGDEYHADDQ
G. gallus   ...MQRRQSSKHSKRPLQVHHSNQTDLSAWR...KGGTVDTEKSAQNRQSLSDQKNDNE
M. musculus MATQVRVTRNSQQQNRISQGSNSRQTSLLDDWMVKDKSGNFKSVLK...ESSSVEDSTRTDDR
X. laevis   .....MEERPP.....KSSQDESMRKQDV
D. rerio    .....MAGLSNLTGL...VSEPSGEAESSVSVSNRSLRLAEKKEKK
S. cerevisiae .....
S. pombe    .....MESFENK
C. fumosorosea .....MPA
T. terrestris .....MSS
C. thermophilum .....MVN
M. thermophila .....MPS
consensus>50 .....
```

PDB

PSIPRED

```
70      80      90      100     110
H. sapiens  AEEEDATQMAVGYFEKGIKASQNKDKTLEKHLKTVENVAWKNGLASEETDITLNL.IALS
G. gallus   ..QDSELEQALSYFEKIQDRVSLKSEVLEKHLSTMESIALKRNGLPPEGFVLDL.VALS
M. musculus T.EGALQVAVGYFQKPKKASLSKDKVLEKHLTTVENVALSNGLAPEAIDITLNL.VALS
X. laevis   S.IQQMEDALFLKKNVSKVPLKGNHTLISHISAVENLGLKKGIPDPGIVITLNL.LALS
D. rerio    GEADPEATAAAKYLQFKAGTTRVGNDELERLILVVEVVAVKGLPPEGVITLNL.LALS
S. cerevisiae .MSLILDDIILSLTANERTP...PQALKTLSLLYEKSKQYGLSSPQLQALVRL.LLCT
S. pombe    G.FLDIEEGIQWIKKNSENLSSKKTILAR.LQFHKLCSEVCLNOHSSISSLILNHSK
C. fumosorosea AGDDEITNLIADIVAASKLPPKARATLVRP.SVNSLASLAYERGLLFAALDEILA.LVLTTP
T. terrestris PERDDLDDGLLGLLEAASKLPKARRQTSIKPTVERTITLILYDRGALPDELARLVLD.LLTVR
C. thermophilum TEEDGLPRLIDATEEASKIPAKRRQTPIKPTIEKLTTHLYTHGASPDLLRLAD.LLTVR
M. thermophila PEDDDLGGLIQDLEAASKVPAKRRQTNIKS.TVEKATALLYDRGALPDELARLVLD.LLTVR
consensus>50 ..ed.le.i...e.....q.l...i.....Glp.e.d.lid..l.l.
```

PDB

PSIPRED

```
120     130     140     150     160
H. sapiens  GKFGNAVNTRILK.CMIPATVISEDSVVKAVSWLVCV.....KCSGS TKVLFYRWLV
G. gallus   GKLADTVNTRLLK.SLIPASAIPESSIVSVSWFPCVS.....KCSNIIQLFLRWLI
M. musculus GKFGNAVNSRILK.CMIPESHISEDSVVKAVSWLVCV.....KCSGNTKVLFYRWLV
X. laevis   GYLVDLINVRLMK.CLIPASEVTRSSILQAVSLFCVV.....KCSNTQILFLRWLI
D. rerio    LNAGTPNCSRILK.FLIPATVVPQEAIVKGVSWLVCV.....KMPMNAQVFLRWLV
S. cerevisiae SIIDTVTKVYIVENCFLPDGYLELLELHHLGTPTVFSRYRIQTPPVLSALCKWLV
S. pombe    THFDKNHVQLLIK.CLYPNEELISQTIAIRIISLDPH.....GLRCSYAIQAKLLNWL
C. fumosorosea SLDQAS.....
T. terrestris NHLDAQSLAAIVR.NLYPSGKVADETVLRVVGALGHG.....QLKPSLP LQALFLRWLV
C. thermophilum NHLDAQSLAAIVR.NLYPSTVSDEVVLRFIGALGHG.....QLKPTLALQALFLRWLV
M. thermophila NHLDAQSLGAIIVR.NLYPSGKVSDEVVLRFIGALGHG.....QLKPSFPLQALFLRWLV
consensus>50 ..ldqa...i.k..l.p...v.ee.vl..vs.l.....k.s...q.lflrwlv
```

PDB

PSIPRED

```
170     180     190     200     210     220
H. sapiens  AMFDFID.RKEQINLL.YGFFFAQLQDDAFC.PYVCHL.LYLLTKKENVKPFVRKLLDLO
G. gallus   TMFDFID.HKEQVHAL.YGFFFSFLNDEKCPYICHV.LYLLTKKENVKPFVRKLLDLO
M. musculus AMFDFID.HKKQISSL.YGFFFASLQDDTFC.PYVCHL.LYLLTKKENVKPFVRKLLDLO
X. laevis   TVFDFIT.CKDILSSFYNFPCFLNYDNL.....
D. rerio    TVFDFID.CKDDLRSI.YGFFFSFVTEETLCPFFICHL.LYLLTTRHVPYRVRKLLDIO
S. cerevisiae HVYFLFVHSEREHNS.SSIWHLWQFSFLQKWITPLVWQATTPVDVKPKLSI IKRCA
S. pombe    HVEFLD.GNNLCRY.YGVLFHFLDFLTLRPIYSNL.LVLLTKHYHVKSFRIHQLLALY
C. fumosorosea GVHHALE.EPGVLSRA.YPVFLNLDTAATRPQLAHL.LALITRRKHVRPFRIQNLNLS
T. terrestris MVYHLE.NPTILSQA.YGVFLNLDTAATRPQLCHL.LALVTRRKHVRPFRIQNLNLS
C. thermophilum MVYHLE.NPGVLQGV.YGVFLDLDTAATRPQLCHL.LALVTRRKHVRPFRIQALITLS
M. thermophila MVYHLE.NPAVLSQV.YSVFLNLDTAATRPQLCHL.LALVTRRKHVRPFRIQGLD.
consensus>50 .vfd..d...e.l...ygv.f..ld...l.p.ichl.l.l.t.r.hv.pfrv..lldl.
```

PDB

PSIPRED

```
230     240     250     260     270
H. sapiens  AKMG.M..QP.....HQLALLS.LYKFFAPALISVSLPVRKKIYFKN..SENLWKTALL
G. gallus   SKMG.M..QP.....HQLALLS.LYKLFCELVSITLPQKMKIYFKN..ADGFWKAAN
M. musculus AKMG.M..QP.....HQLALLS.LYKFFAPTLISVSLPVRKKIYFNN..SNLWTSASL
X. laevis   ..GL..QP.....HLLGLLSVYKIFCELVTLTLPFRFKSYFKS..SHLWRMELK
D. rerio    AKMGR..QP.....FLTQLLALYKVFPRDLVTLTLPSPRARTGFKN..HNSWTKVALS
S. cerevisiae MHPGYRDAPGSATLILQR.FQCLVGASSQRTESIITINGNRKTLKSHRNKLDLHFLSILK
S. pombe    QKPGNTADP.....YLLALLLTYKQHFDPVIVGSVYTRKHGGSVR..LDSEWIAATK
C. fumosorosea RQTGN..DP.....TLVGLLRVYKDYYPEIIVGEAVRGRASAFKH..PDPWRERMD
T. terrestris .....DP.....TLVGLLRVYKDYYPEIIVGEAVRGRASAFKH..PDPWRERMD
C. thermophilum RQTGG..DP.....NLTGLLRVYKDYYPEIIVGDATKGRASAFKH..PDPWRQHLD
M. thermophila .....DP.....NLTGLLRVYKDYYPEIIVGDATKGRASAFKH..PDPWRQHLD
consensus>50 ..g...qp.....l..ll.yk.f.pe.i.....fk...d..w...l.
```

PDB

PSIPRED

```
280     290     300     310     320     330
H. sapiens  AVKQRNNGPSP.EPLKLMG.PAN...VRLKRRKWN.SLSVIPVLNSSSYTCEGKKEMSLR
G. gallus   AVQRNQANSTVBPQLLLGTAQ...PHSRKRRWN.TQILVFPASSANAQNLVVGK.MSRA
M. musculus AVRLRNQGAFFPEPLNPLRPTT...GSLKRRKWN.SHSVIPALN..SANKEYGEKTASLF
X. laevis   EVKRNAGDPAADSRLLIFGDKEQVLSYSRKRKWN.SNMPPPVHG...IIWGKAPVLAD
D. rerio    AVQRNKGAVLVDQSLVSVKVEK..PSSRKRKRH.HLAVPPLSS...AF
S. cerevisiae RILSRAH.PANFPADTVQNTIDM..YLSETHQLG.ADSIYPLRL...QSLP
S. pombe    AILNRQSEDEVPLET.....WSSKRRKRS.SLIPDLIT.....
C. fumosorosea ELQEAHLQQTQERMSRPRDAFR...VHKSVGRGQ.RKTAALPSVH...
T. terrestris EIQR.RSKRQDDRSVRNGFAV..NHALSRRLKGAQVLPFAVH...
C. thermophilum EIQR.RSEAQED.GVRNGFSV..NHALGRRLRGTAKAVLPTVH...
M. thermophila EIQR.RSEYRDDQGVNRNGFAV..NHALDOKLKTARS.SLPIVR...
consensus>50 .v.qrn.d.ed...g.....s.krk.n...v.p.
```

PSIPRED

Sequence alignment for PSIPRED 340-380. Species: H. sapiens, G. gallus, M. musculus, X. laevis, D. rerio, S. cerevisiae, S. pombe, C. fumosorosea, T. terrestris, C. thermophilum, M. thermophila, consensus>50. Conserved residues: NRS, SFP, LEO, Q, S, F, P, Q, L, L, Q, N, I, H, C, L, E, L, P, S, Q, M, G, S, V, L, N, S, P, L, L, L, H, Y, I, N, C, V, R, D, E, P, V, L, L.

PSIPRED

Sequence alignment for PSIPRED 390-430. Species: H. sapiens, G. gallus, M. musculus, X. laevis, D. rerio, S. cerevisiae, S. pombe, C. fumosorosea, T. terrestris, C. thermophilum, M. thermophila, consensus>50. Conserved residues: R, F, Y, Y, W, T, S, Q, T, L, Q, E, E, C, I, W, Y, K, V, N, N, Y, E, H, G, K, E, F, T, N, F, L, D, T, I, I, R, A, E, C, F, L, Q, E, G, F, Y, S, C, E, A, F.

PSIPRED

Sequence alignment for PSIPRED 440-480. Species: H. sapiens, G. gallus, M. musculus, X. laevis, D. rerio, S. cerevisiae, S. pombe, C. fumosorosea, T. terrestris, C. thermophilum, M. thermophila, consensus>50. Conserved residues: L, Y, K, S, L, P, L, W, D, G, V, C, C, R, S, Q, F, L, Q, L, V, S, W, I, P, L, S, S, F, S, E, V, K, P, L, L, F, D, H, L, A, Q, L, F, F, T, S, T, I, Y.

PSIPRED

Sequence alignment for PSIPRED 490-540. Species: H. sapiens, G. gallus, M. musculus, X. laevis, D. rerio, S. cerevisiae, S. pombe, C. fumosorosea, T. terrestris, C. thermophilum, M. thermophila, consensus>50. Conserved residues: F, K, C, S, V, L, Q, S, L, K, E, L, L, Q, N, W, L, W, L, S, M, D, H, M, K, P, V, T, N, S, F, L, E, T, T, L, G, S, M, N, S, V, S, K, L, I, H, Y, V, G, W.

PSIPRED

Sequence alignment for PSIPRED 550-590. Species: H. sapiens, G. gallus, M. musculus, X. laevis, D. rerio, S. cerevisiae, S. pombe, C. fumosorosea, T. terrestris, C. thermophilum, M. thermophila, consensus>50. Conserved residues: L, S, T, A, M, R, L, E, S, N, T, F, L, L, H, F, I, L, D, F, Y, E, K, V, C, D, I, Y, I, N, Y, N, L, P, L, V, V, L, F, P, P, G, I, F, Y, S, A, L, L, S, D, T, S, I.

PSIPRED

Sequence alignment for PSIPRED 600-650. Species: H. sapiens, G. gallus, M. musculus, X. laevis, D. rerio, S. cerevisiae, S. pombe, C. fumosorosea, T. terrestris, C. thermophilum, M. thermophila, consensus>50. Conserved residues: L, N, Q, L, C, F, I, M, H, R, Y, R, K, N, L, T, A, A, K, K, N, E, L, V, Q, K, T, K, S, E, F, N, F, S, S, K, T, Y, Q, E, F, N, H, Y, L, T, S, M, V, G, C, L.

PSIPRED ll ll llllll

660 670 680 690

|                 |     |      |           |       |     |      |     |      |      |         |           |       |       |       |     |     |     |     |    |     |     |     |    |    |
|-----------------|-----|------|-----------|-------|-----|------|-----|------|------|---------|-----------|-------|-------|-------|-----|-----|-----|-----|----|-----|-----|-----|----|----|
| H. sapiens      | WT  | SKPF | GK        | ...   | GI  | YD   | ..  | PE   | ILEK | I       | .....     | GV    | A     | EY    | KNS | ..  | LN  | VV  | HH | PS  | F   | LS  | Y  |    |
| G. gallus       | WT  | SSAF | QKDNHP    | ..    | E   | G    | IR  | LD   | ..   | DE      | LL        | KK    | T     | ..... | GV  | REY | KNS | ..  | FN | IV  | YH  | PA  | LM | CY |
| M. musculus     | WT  | SRPF | KA        | ..... | GV  | YD   | ..  | PE   | TI   | ENT     | .....     | GG    | TQY   | KST   | ..  | LN  | IV  | YH  | PS | LS  | LS  | Y   |    |    |
| X. laevis       | WT  | SHAF | HQDTHP    | ..    | Q   | G    | IQ  | LE   | ..   | TH      | LL        | ESS   | ..... | GV    | LTY | KKA | ..  | FN  | IV | YH  | PA  | LIG | Y  |    |
| D. rerio        | WNS | QWC  | IP        | ..... | GS  | DL   | E   | INKD | L    | LALS    | .....     | KI    | AEP   | WCC   | ..  | FD  | I   | HH  | PA | LFS | Y   |     |    |    |
| S. cerevisiae   | YRN | KVL  | SSKSLF    | ..    | GV  | S    | PDF | FKQ  | I    | LEN     | LYI       | ..... | PT    | ADF   | KNA | KF  | FT  | IT  | GI | PA  | LSY | I   |    |    |
| S. pombe        | LL  | KEKR | AILSFLQLW | EP    | FKS | DYSQ | FL  | PIA  | TRIA | .....   | ND        | HPYA  | QR    | V     | F   | SLT | CA  | PQ  | FF | SY  |     |     |    |    |
| C. fumosorosea  | WR  | MHAF | GVERGDVEQ | GC    | MLP | ..   | AA  | ARER | L    | GRYAAAA | ADR       | GV    | VTL   | AAA   | ..  | LS  | LS  | YS  | PV | L   | CLQ |     |    |    |
| T. terrestris   | WR  | GRAF | STTDENA   | Q     | GCC | VP   | ..  | QS   | IQ   | PR      | LESYLRAAD | S     | D     | LSL   | ATA | ..  | FN  | LS  | HS | PL  | L   | CLQ |    |    |
| C. thermophilum | WR  | GRAF | TTTDLNA   | R     | GCL | LP   | ..  | QS   | VQ   | TV      | LEKYVRAVD | S     | E     | MSL   | AVV | ..  | F   | GLS | YA | PT  | L   | CLQ |    |    |
| M. thermophila  | WR  | GRAF | STTDVNA   | Q     | GCR | IP   | ..  | QP   | VO   | AT      | LEAYMRTAD | P     | D     | LSL   | ATA | ..  | F   | GLS | HS | PL  | L   | CLQ |    |    |
| consensus>50    | w   | ..   | a         | f     | ..  | g    | ..  | d    | ..   | e       | ..        | y     | ..    | f     | n   | i   | ..  | P   | .. | l   | ..  | y   |    |    |

PSIPRED llllllll lll

700 710

|                 |    |   |     |       |       |    |     |     |     |       |    |       |    |       |    |       |    |       |   |       |    |    |    |   |   |   |   |   |   |   |   |    |    |       |    |    |       |       |       |    |   |   |
|-----------------|----|---|-----|-------|-------|----|-----|-----|-----|-------|----|-------|----|-------|----|-------|----|-------|---|-------|----|----|----|---|---|---|---|---|---|---|---|----|----|-------|----|----|-------|-------|-------|----|---|---|
| H. sapiens      | AV | S | FLI | QES   | ..... | PE | ER  | T   | VNV | SS    | IR | GK    | .. | ..... | KW | ..... | SW | Y     |   |       |    |    |    |   |   |   |   |   |   |   |   |    |    |       |    |    |       |       |       |    |   |   |
| G. gallus       | AV | D | FLQ | QAW   | ..... | PD | DT  | F   | NFN | L     | IK | GK    | .. | ..... | KW | ..... | NW | Y     |   |       |    |    |    |   |   |   |   |   |   |   |   |    |    |       |    |    |       |       |       |    |   |   |
| M. musculus     | AA | S | FLI | QES   | ..... | PE | EM  | T   | HL  | S     | IQ | GK    | .. | ..... | KW | ..... | NW | Y     |   |       |    |    |    |   |   |   |   |   |   |   |   |    |    |       |    |    |       |       |       |    |   |   |
| X. laevis       | CV | H | FYH | QIF   | ..... | SE | DK  | F   | RLQ | L     | IK | GR    | .. | ..... | LW | ..... | NK | Y     |   |       |    |    |    |   |   |   |   |   |   |   |   |    |    |       |    |    |       |       |       |    |   |   |
| D. rerio        | AI | E | FHQ | RCW   | ..... | PE | RK  | V   | DLG | S     | IK | TGK   | .. | ..... | Y  | ..... | NW | Y     |   |       |    |    |    |   |   |   |   |   |   |   |   |    |    |       |    |    |       |       |       |    |   |   |
| S. cerevisiae   | CI | I | ILR | LETAE | ..    | N  | T   | KIK | F   | TSG   | I  | IN    | EE | T     | FN | N     | F  | R     | V | H     | H  | D  | E  | I | G | H | G | W | I | K | G | V  | N  | N     | I  | H  | D     | L     | R     |    |   |   |
| S. pombe        | IN | G | YQ  | IY    | L     | Q  | T   | N   | ..  | P     | A  | T     | G  | S     | I  | F     | L  | K     | P | I     | O  | EE | T  | F | G | A | F | O | S | N | H | L  | S  | D     | .. | SW | ..... | ED    | F     | Q  |   |   |
| C. fumosorosea  | SS | E | ALR | AL    | EVRR  | IA | ADE | A   | VE  | T     | R  | H     | A  | G     | P  | A     | S  | QE    | S | L     | R  | R  | L  | A | T | S | G | G | I | R | L | .. | GF | ..... | NG | Y  | R     |       |       |    |   |   |
| T. terrestris   | SI | S | LVR | E     | LE    | D  | LEA | ..  | D   | E     | I  | R     | A  | R     | H  | G     | G  | P     | V | T     | QA | S  | L  | N | Q | L | A | N | R | G | G | L  | S  | L     | .. | SW | ..... | QE    | Y     | R  |   |   |
| C. thermophilum | AI | S | FMR | E     | LE    | D  | E   | D   | ..  | E     | S  | V     | Q  | A     | R  | H     | A  | G     | P | V     | T  | QA | S  | L | A | R | L | A | R | R | G | G  | L  | E     | L  | .. | SW    | ..... | OD    | Y  | R |   |
| M. thermophila  | SL | S | YIR | Q     | LE    | E  | D   | E   | M   | ..    | E  | D     | L  | R     | A  | R     | H  | A     | G | P     | V  | T  | QV | S | L | G | R | L | A | N | R | G  | G  | L     | A  | L  | ..    | SW    | ..... | QE | Y | R |
| consensus>50    | .. | i | ..  | f     | l     | .. | q   | l   | e   | ..... | e  | ..... | g  | ..    | i  | ..    | q  | ..... | w | ..... | n  | .. | y  |   |   |   |   |   |   |   |   |    |    |       |    |    |       |       |       |    |   |   |

PSIPRED llllllll llllllllllll

720 730 740 750

|                 |    |    |   |   |   |    |   |    |    |    |    |    |   |    |   |   |   |    |   |       |       |       |       |       |       |       |       |       |       |       |       |       |       |       |       |       |       |       |       |       |       |
|-----------------|----|----|---|---|---|----|---|----|----|----|----|----|---|----|---|---|---|----|---|-------|-------|-------|-------|-------|-------|-------|-------|-------|-------|-------|-------|-------|-------|-------|-------|-------|-------|-------|-------|-------|-------|
| H. sapiens      | .. | LD | Y | I | F | S  | Q | G  | .. | Q  | G  | L  | K | L  | F | I | R | S  | S | V     | H     | S     | S     | T     | P     | R     | A     | E     | G     | I     | N     | C     | N     | N     | Q     | Y     | ..    |       |       |       |       |
| G. gallus       | .. | LR | Y | I | G | Q  | G | .. | L  | E  | G  | L  | K | L  | F | I | E | S  | S | I     | N     | R     | V     | S     | K     | A     | S     | Q     | S     | K     | A     | E     | D     | E     | D     | E     | K     | V     | ..    |       |       |
| M. musculus     | .. | LD | Y | I | S | E  | G | .. | F  | Q  | G  | L  | K | L  | F | I | R | S  | S | V     | H     | S     | S     | V     | P     | K     | P     | E     | N     | T     | E     | ..... | ..... | ..... | ..... | ..... | ..... | ..... |       |       |       |
| X. laevis       | .. | LE | F | I | Y | S  | Q | .. | L  | N  | G  | L  | K | H  | F | I | E | S  | S | V     | N     | R     | L     | A     | S     | N     | S     | Q     | Q     | E     | P     | C     | D     | L     | L     | S     | S     | K     | S     |       |       |
| D. rerio        | .. | ME | F | I | F | N  | Q | .. | E  | D  | G  | L  | N | N  | F | I | R | T  | N | T     | G     | H     | G     | P     | S     | S     | S     | Q     | D     | D     | R     | Q     | P     | L     | S     | Q     | N     | C     | H     |       |       |
| S. cerevisiae   | V  | K  | I | L | M | H  | I | S  | N  | T  | A  | N  | P | Y  | R | D | I | A  | A | F     | L     | E     | T     | Y     | L     | K     | S     | L     | S     | K     | Y     | S     | V     | O     | N     | S     | ..... | ..... | ..... | ..... | ..... |
| S. pombe        | K  | N  | F | I | Y | L  | K | K  | K  | G  | .. | Y  | L | A  | I | S | D | F  | L | L     | S     | T     | L     | N     | R     | ..    | ..    | ..    | ..    | ..    | ..    | ..    | ..    | ..    | ..    | ..    | ..    | ..    | ..    | ..    | ..    |
| C. fumosorosea  | A  | S  | V | L | E | A  | L | R  | A  | K  | G  | .. | M | P  | G | V | E | E  | L | K     | A     | S     | M     | P     | S     | A     | A     | K     | A     | I     | E     | S     | W     | A     | A     | G     | K     | E     | A     | ..    | ..    |
| T. terrestris   | A  | A  | V | L | A | H  | L | E  | S  | K  | G  | .. | L | P  | G | I | P | E  | L | M     | Y     | N     | T     | M     | K     | N     | L     | M     | K     | A     | R     | K     | ..    | ..    | ..    | ..    | ..    | ..    | ..    | ..    | ..    |
| C. thermophilum | V  | G  | V | L | E | Y  | L | E  | A  | K  | G  | .. | F | G  | I | K | E | L  | M | Y     | N     | T     | M     | K     | N     | L     | M     | K     | E     | R     | R     | T     | ..... | ..... | ..... | ..... | ..... | ..... | ..... | ..... | ..... |
| M. thermophila  | S  | G  | V | L | E | Y  | L | E  | A  | K  | G  | .. | F | G  | I | S | D | L  | M | Y     | N     | T     | M     | K     | N     | L     | M     | R     | A     | R     | R     | S     | ..... | ..... | ..... | ..... | ..... | ..... | ..... | ..... | ..... |
| consensus>50    | .. | l  | e | y | l | .. | g | .. | f  | .. | g  | .. | i | .. | e | f | l | .. | m | ..... | ..... | ..... | ..... | ..... | ..... | ..... | ..... | ..... | ..... | ..... | ..... | ..... | ..... | ..... | ..... | ..... | ..... | ..... | ..... | ..... | ..... |

Figure S2



# CENP-K Alignment

PSIPRED

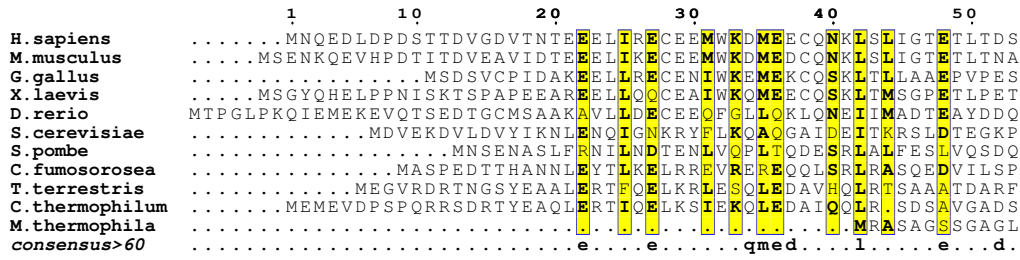

PSIPRED

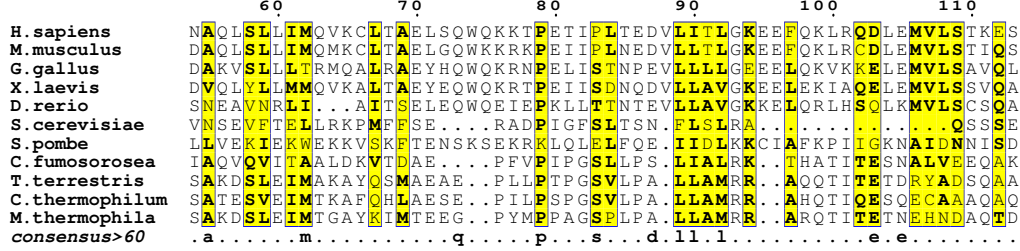

PSIPRED

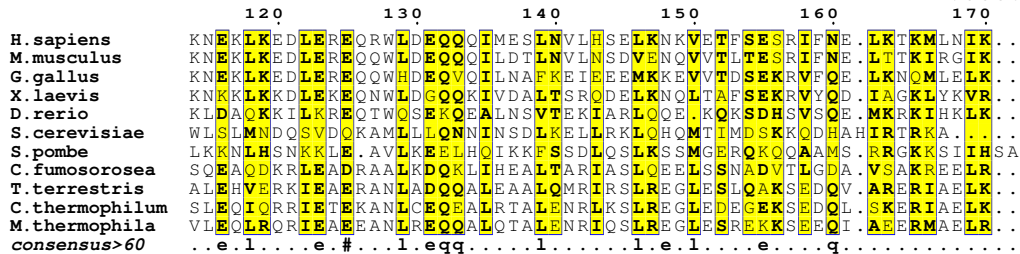

PDB

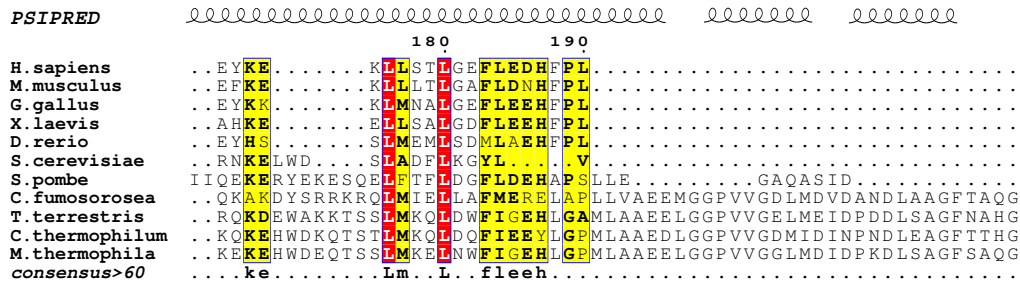

PDB

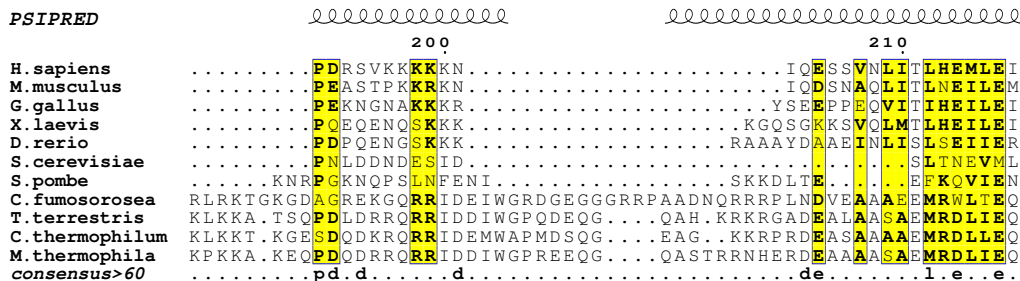

PDB

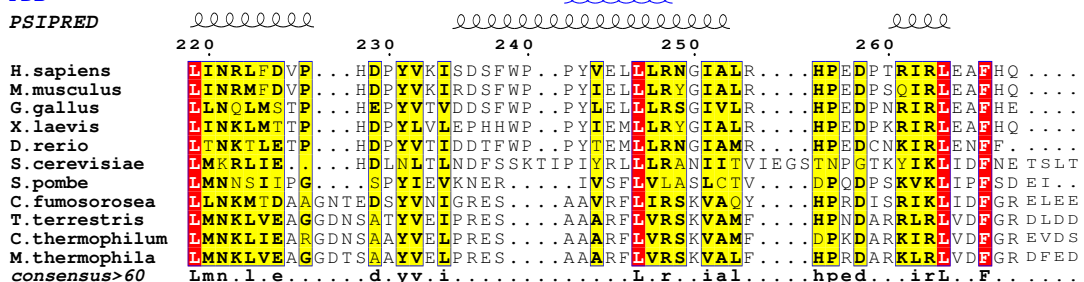

Figure S3



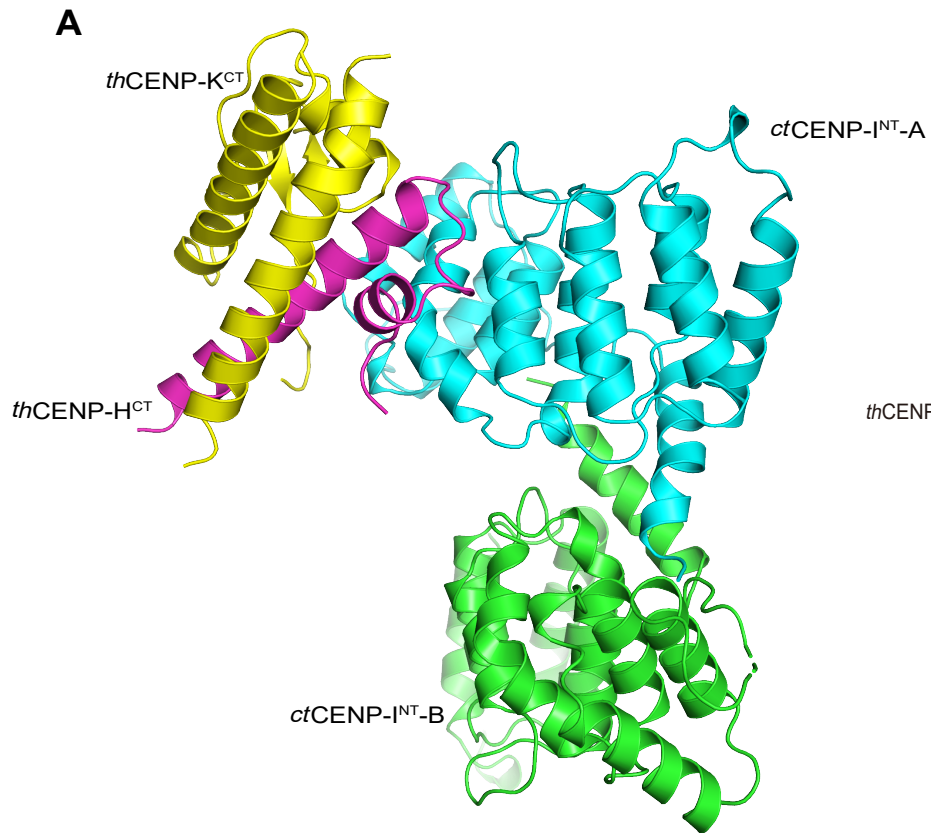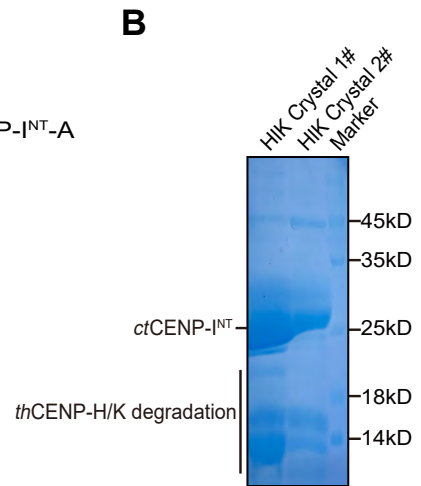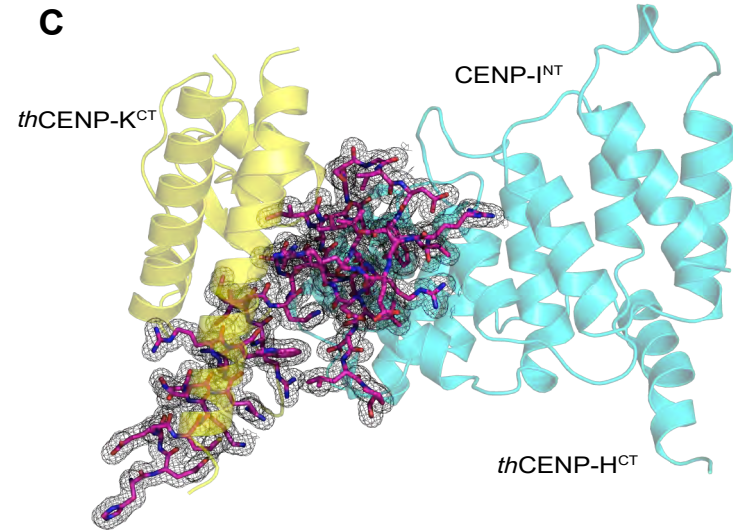

**Figure S5**

**A**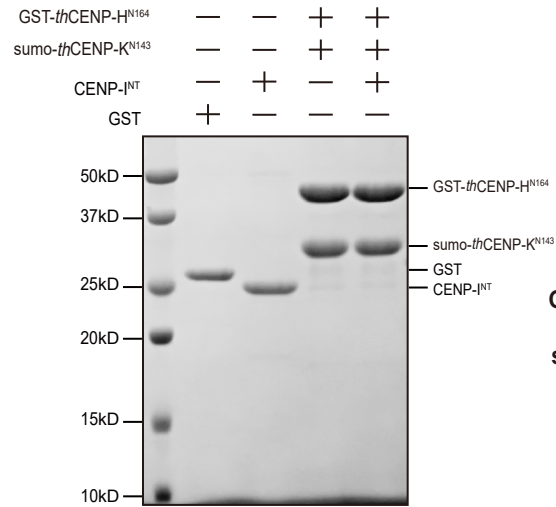**B****GST- *thCENP-K*<sup>ΔN75</sup> pull down *thCENP-H***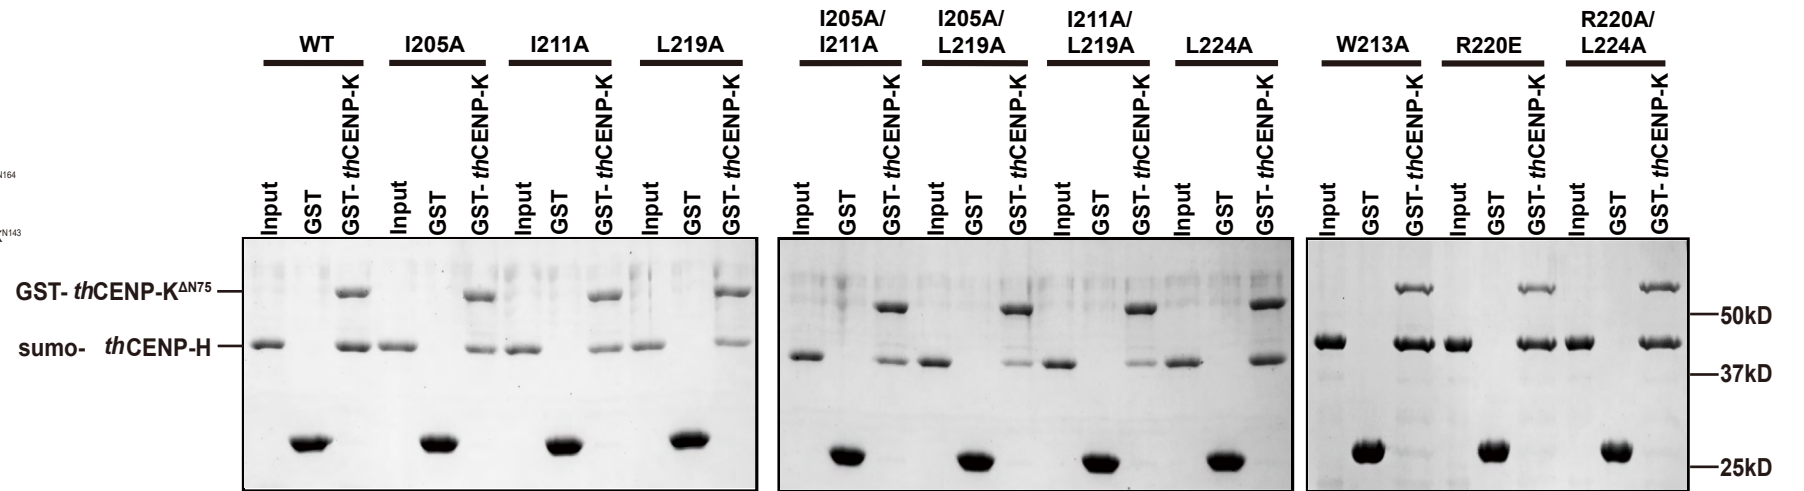**C****GST- *thCENP-K*<sup>FL</sup> pull down *thCENP-H***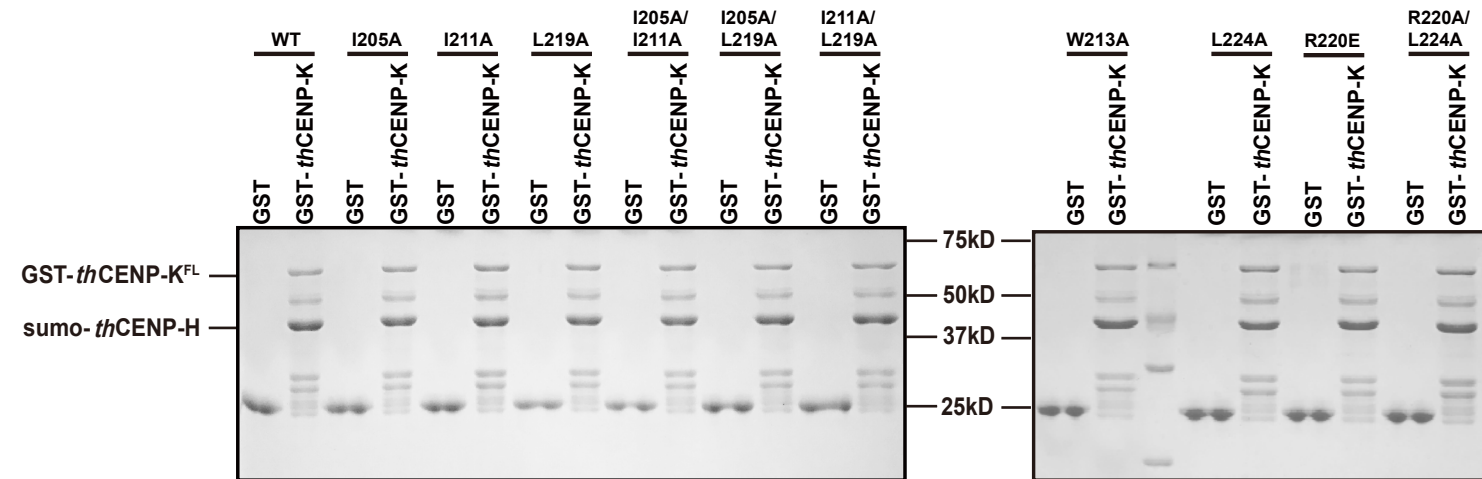**Figure S6**

**A****GST-*hsCENP-K*<sup>ΔN85</sup> pull down *hsCENP-H***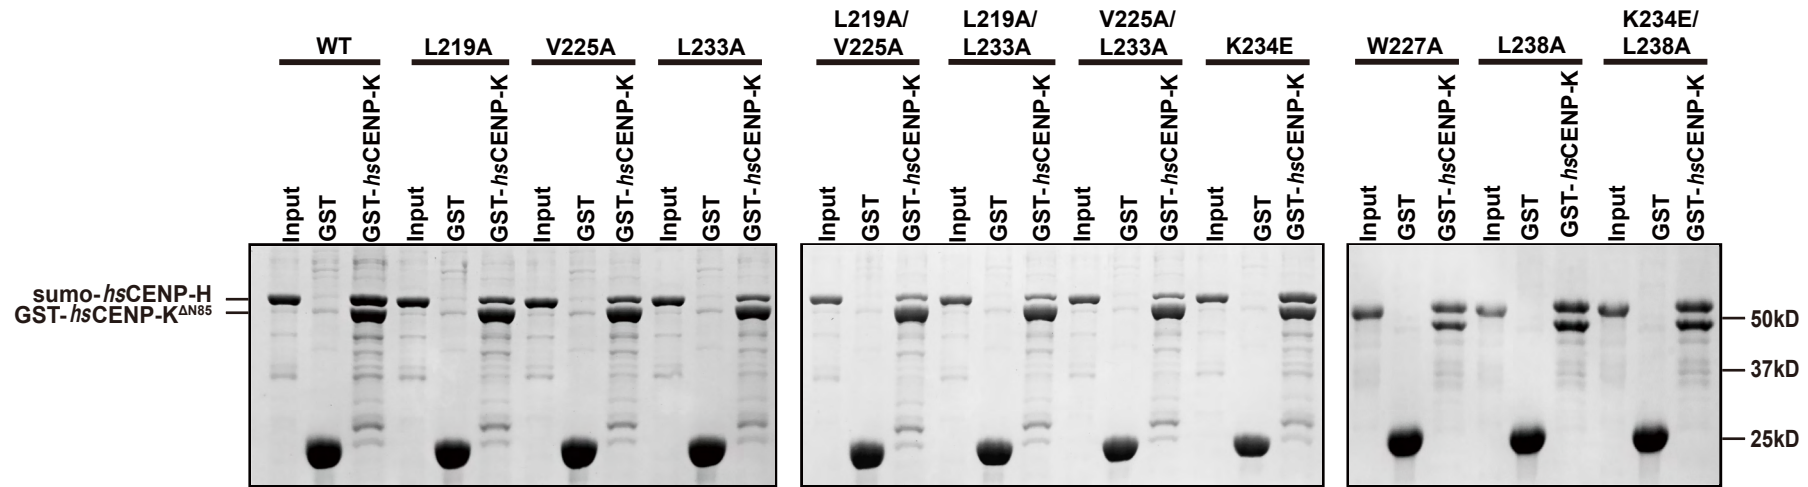**B****GST-*hsCENP-K*<sup>FL</sup> pull down *hsCENP-H***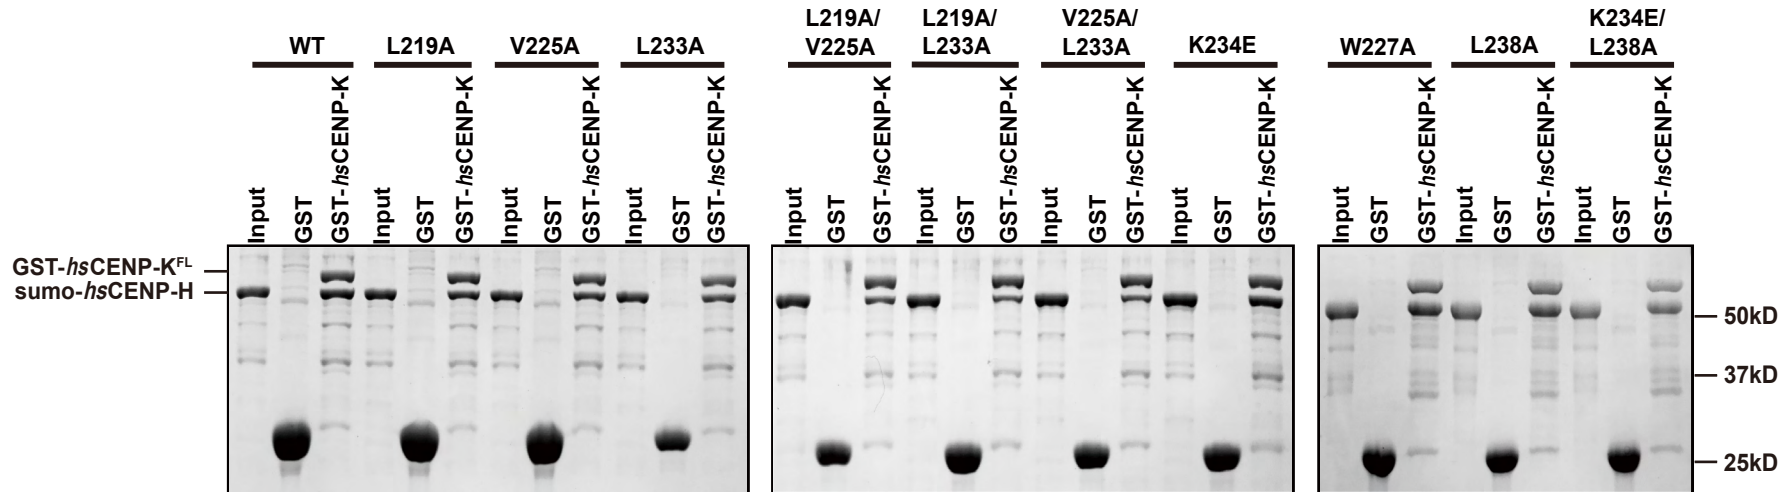**Figure S7**

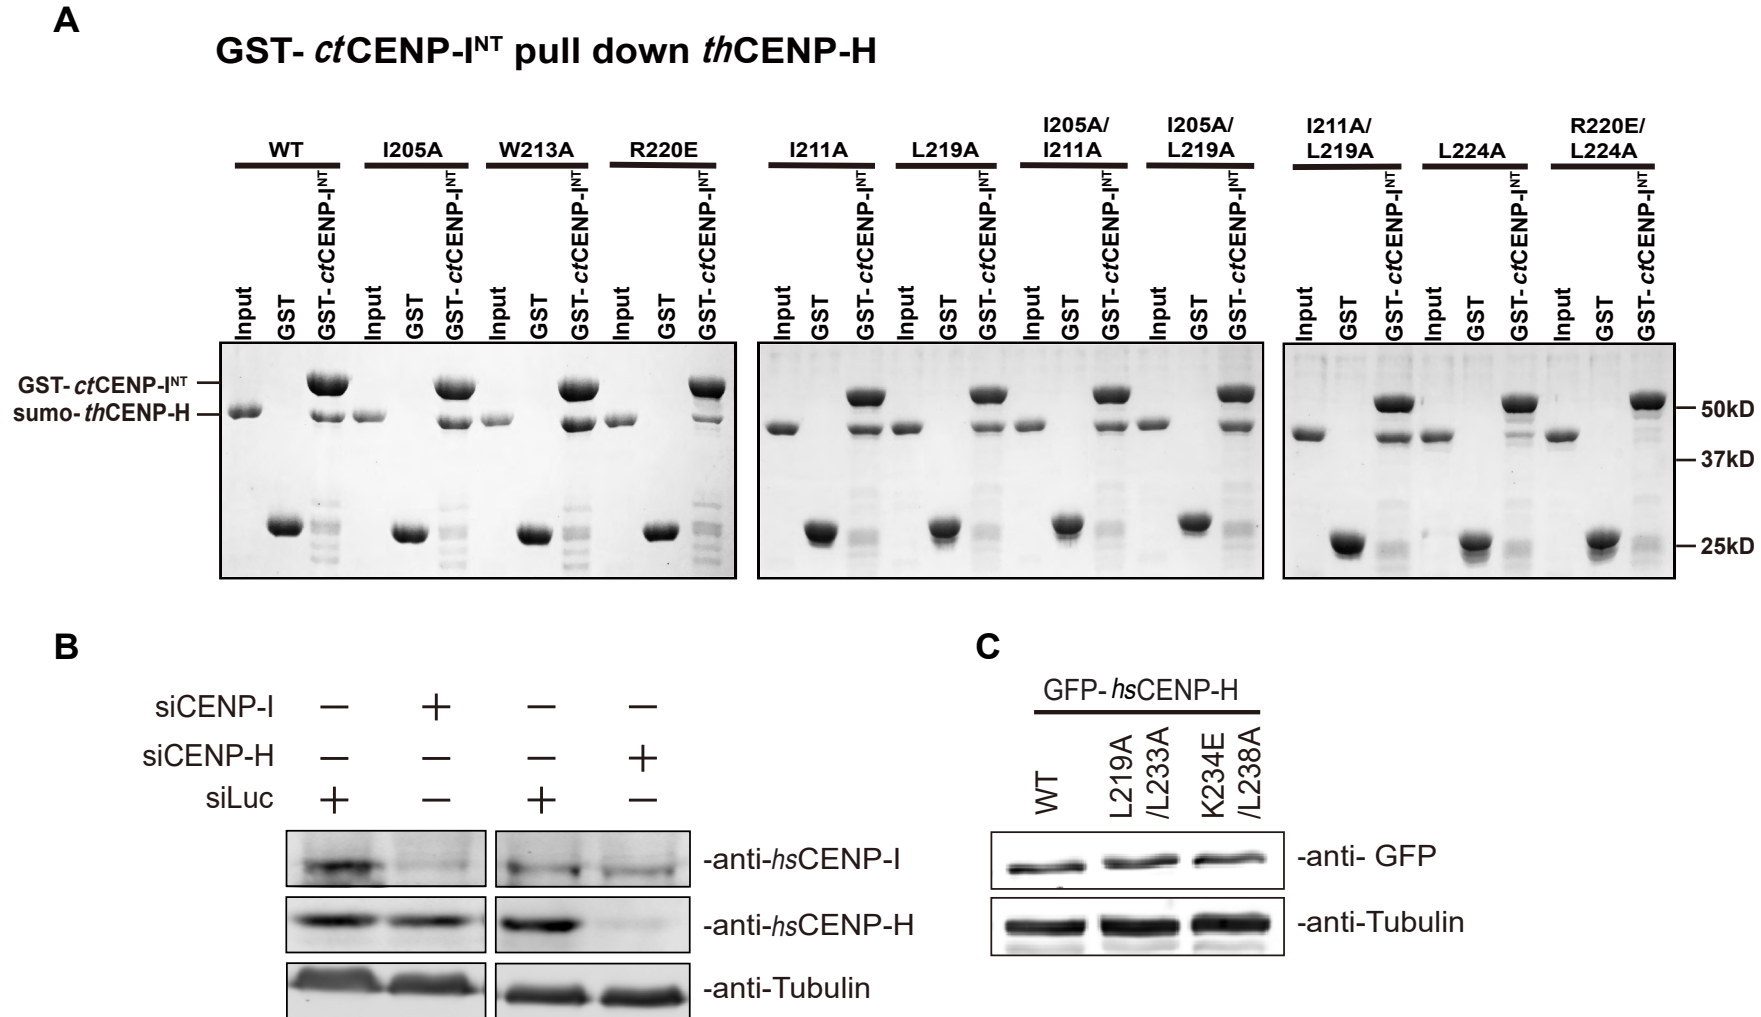

**Figure S8**
